# Supplementary material for: A simplel-cysteine-assisted method for the growth of MoS2nanosheets on carbon nanotubes for high-performance lithium ion batteries
Source: Royal Society of Chemistry journal article supplement (doi:10.1039/c2dt32137h), 2012-11-15
Supplement: c2dt32137h.pdf [file c2dt32137h.pdf]

## Electronic Supplementary Information

### **A simple L-cysteine-assisted method for the growth of MoS<sub>2</sub> nanosheets on carbon nanotubes for high-performance lithium ion batteries**

Seung-Keun Park,<sup>a</sup> Seung-Ho Yu,<sup>b</sup> Seunghee Woo,<sup>c</sup> Bo Quan,<sup>a</sup> Dong-Chan Lee,<sup>b</sup> Min Kun Kim,<sup>b</sup> Yung-Eun Sung,<sup>\*b</sup> and Yuanzhe Piao<sup>\*ad</sup>

<sup>a</sup> Department of Nano Science and Technology, Graduate School of Convergence Science and Technology, Seoul National University, Suwon, 443-270, Republic of Korea.

<sup>b</sup> World Class University (WCU) program of Chemical Convergence for Energy & Environment (C2E2), School of Chemical and Biological Engineering, College of Engineering, Seoul National University, Seoul 151-744, Republic of Korea.

<sup>c</sup> Department of Chemistry, Seoul National University, Seoul 151-747, Republic of Korea.

<sup>d</sup> Advanced Institutes of Convergence Technology, 864-1 Iui-dong, Yeongtong-gu, Suwon-si, Gyeonggi-do 443-270, Republic of Korea.

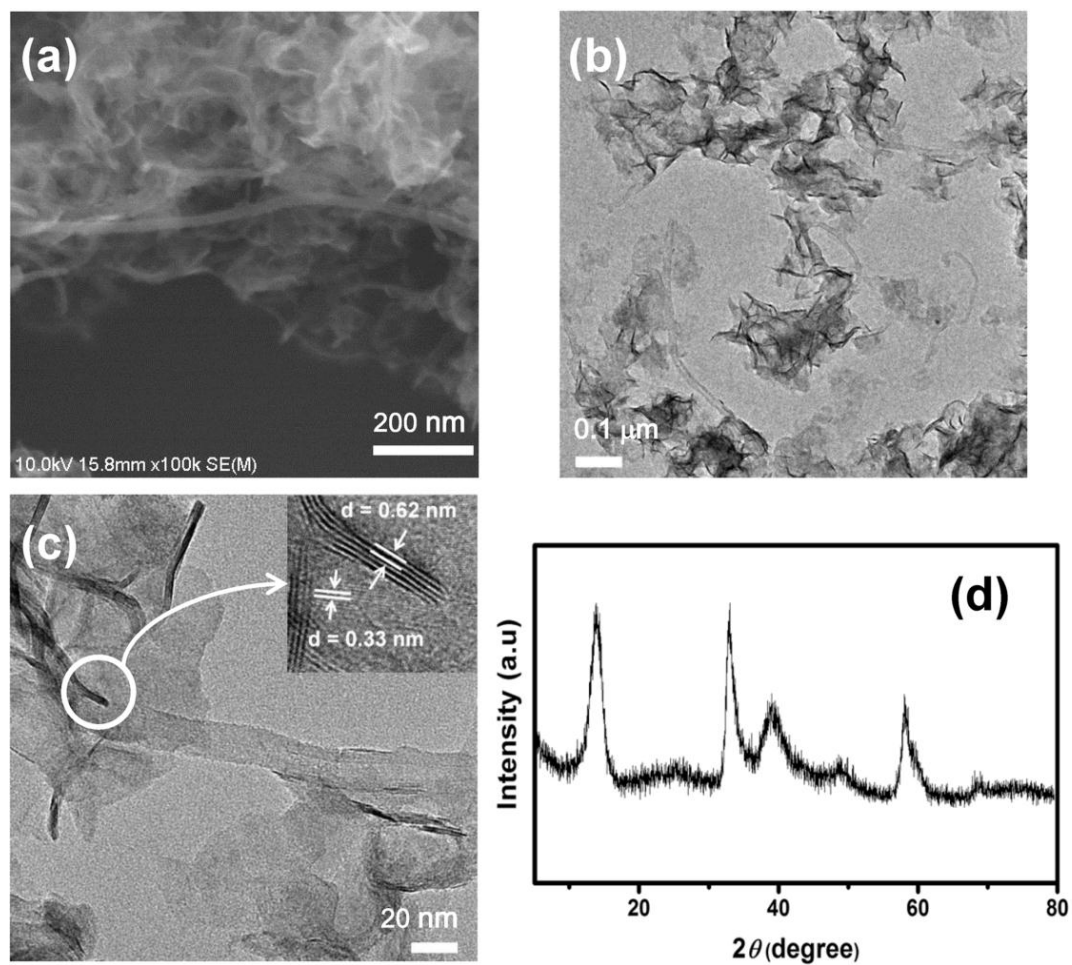

**Fig. S1.** (a) SEM, (b) TEM and (c) HRTEM images of TCM (1:4) and (d) XRD pattern of TCM (1:4).

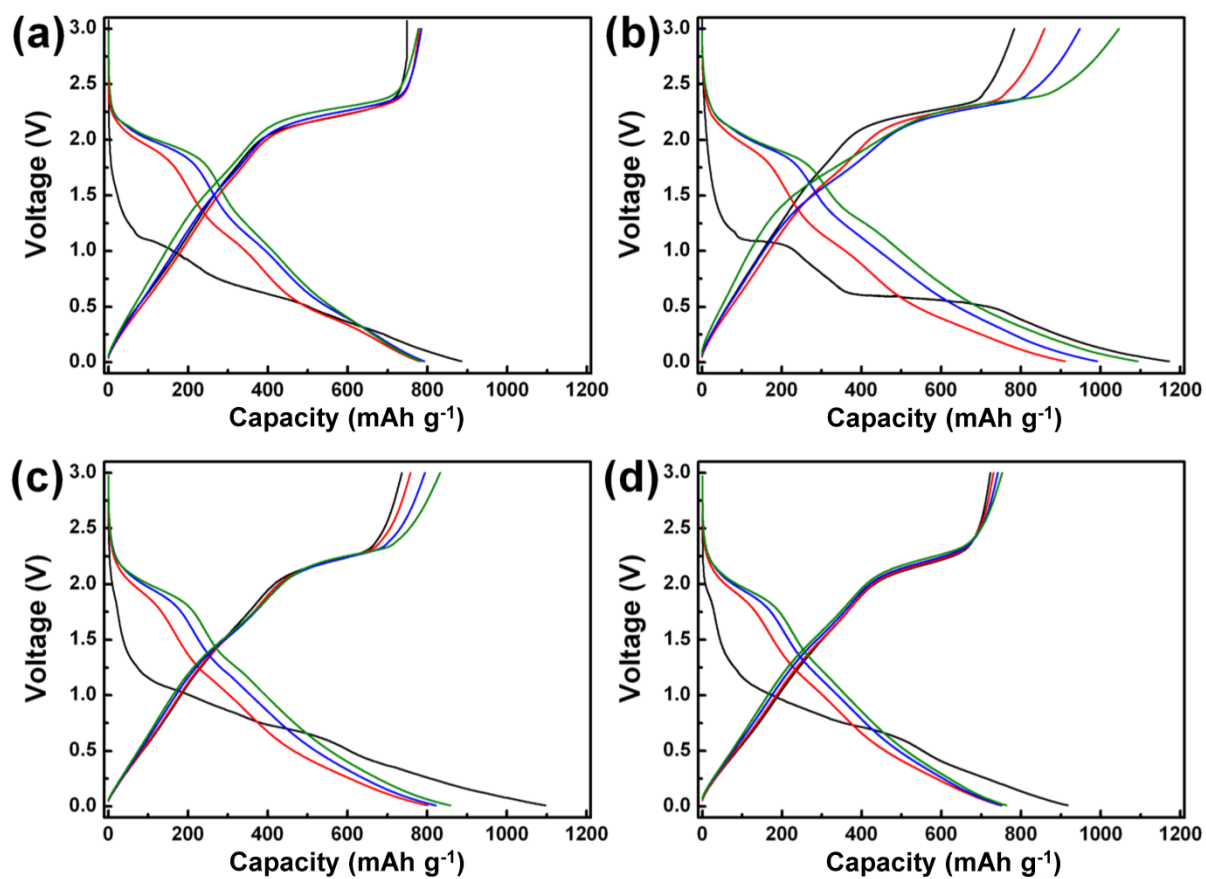

**Fig. S2.** Charge-discharge profiles of (a) MoS<sub>2</sub>, (b) TCM (1:4), (c) LCM (1:4) and (d) LCM (1:2). Black, red, blue and green colors indicate 1<sup>st</sup>, 2<sup>nd</sup>, 5<sup>th</sup> and 10<sup>th</sup> cycle, respectively.

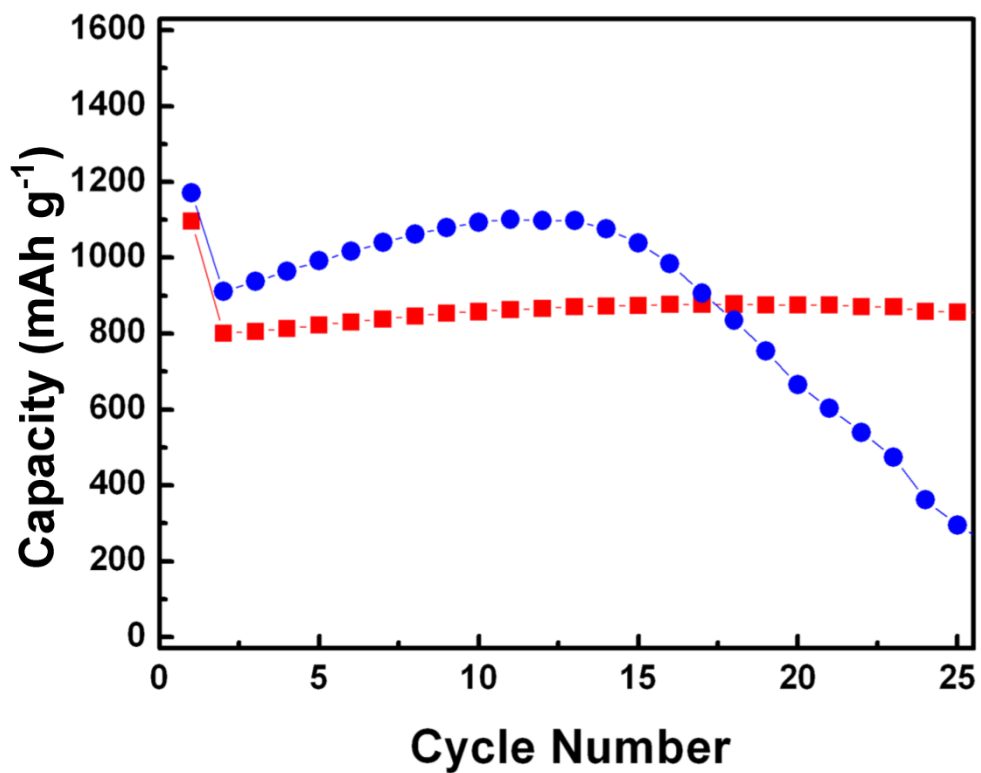

**Fig. S3.** Cycling performance of TCM (1 : 4) (circles, blue) and LCM (1 : 4) (squares, red).

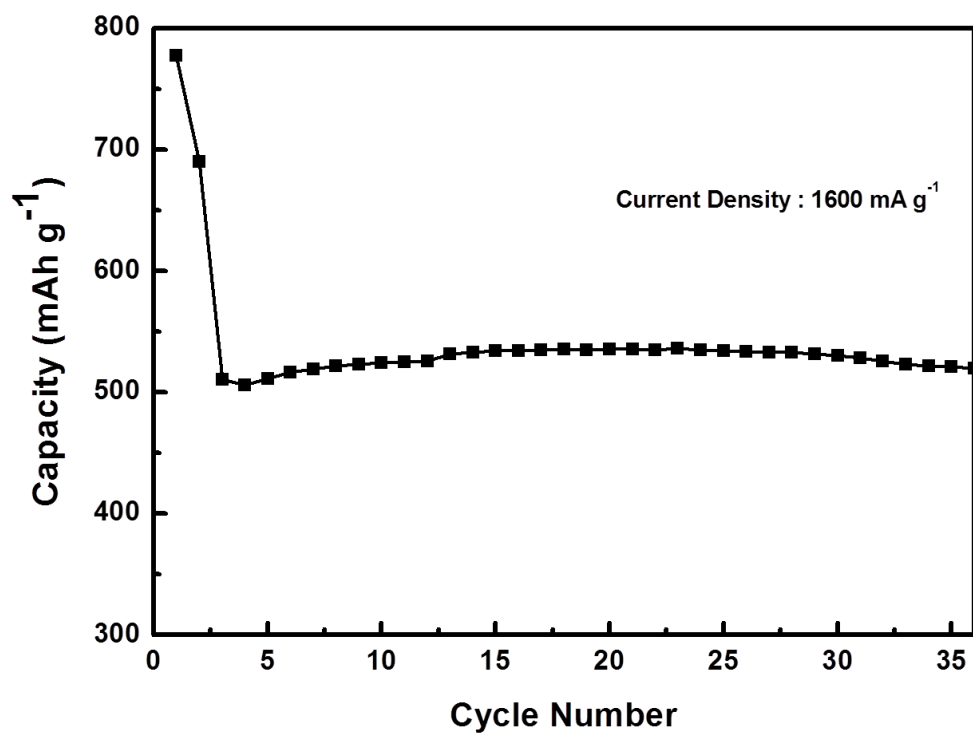

**Fig. S4.** Cycle performance of the LCM (1:4) at current density of 1600 mA g<sup>-1</sup>.
